# Supplementary material
Source: PubMed Central journal article supplement (PMC9489626)

# Supplemental figure 1

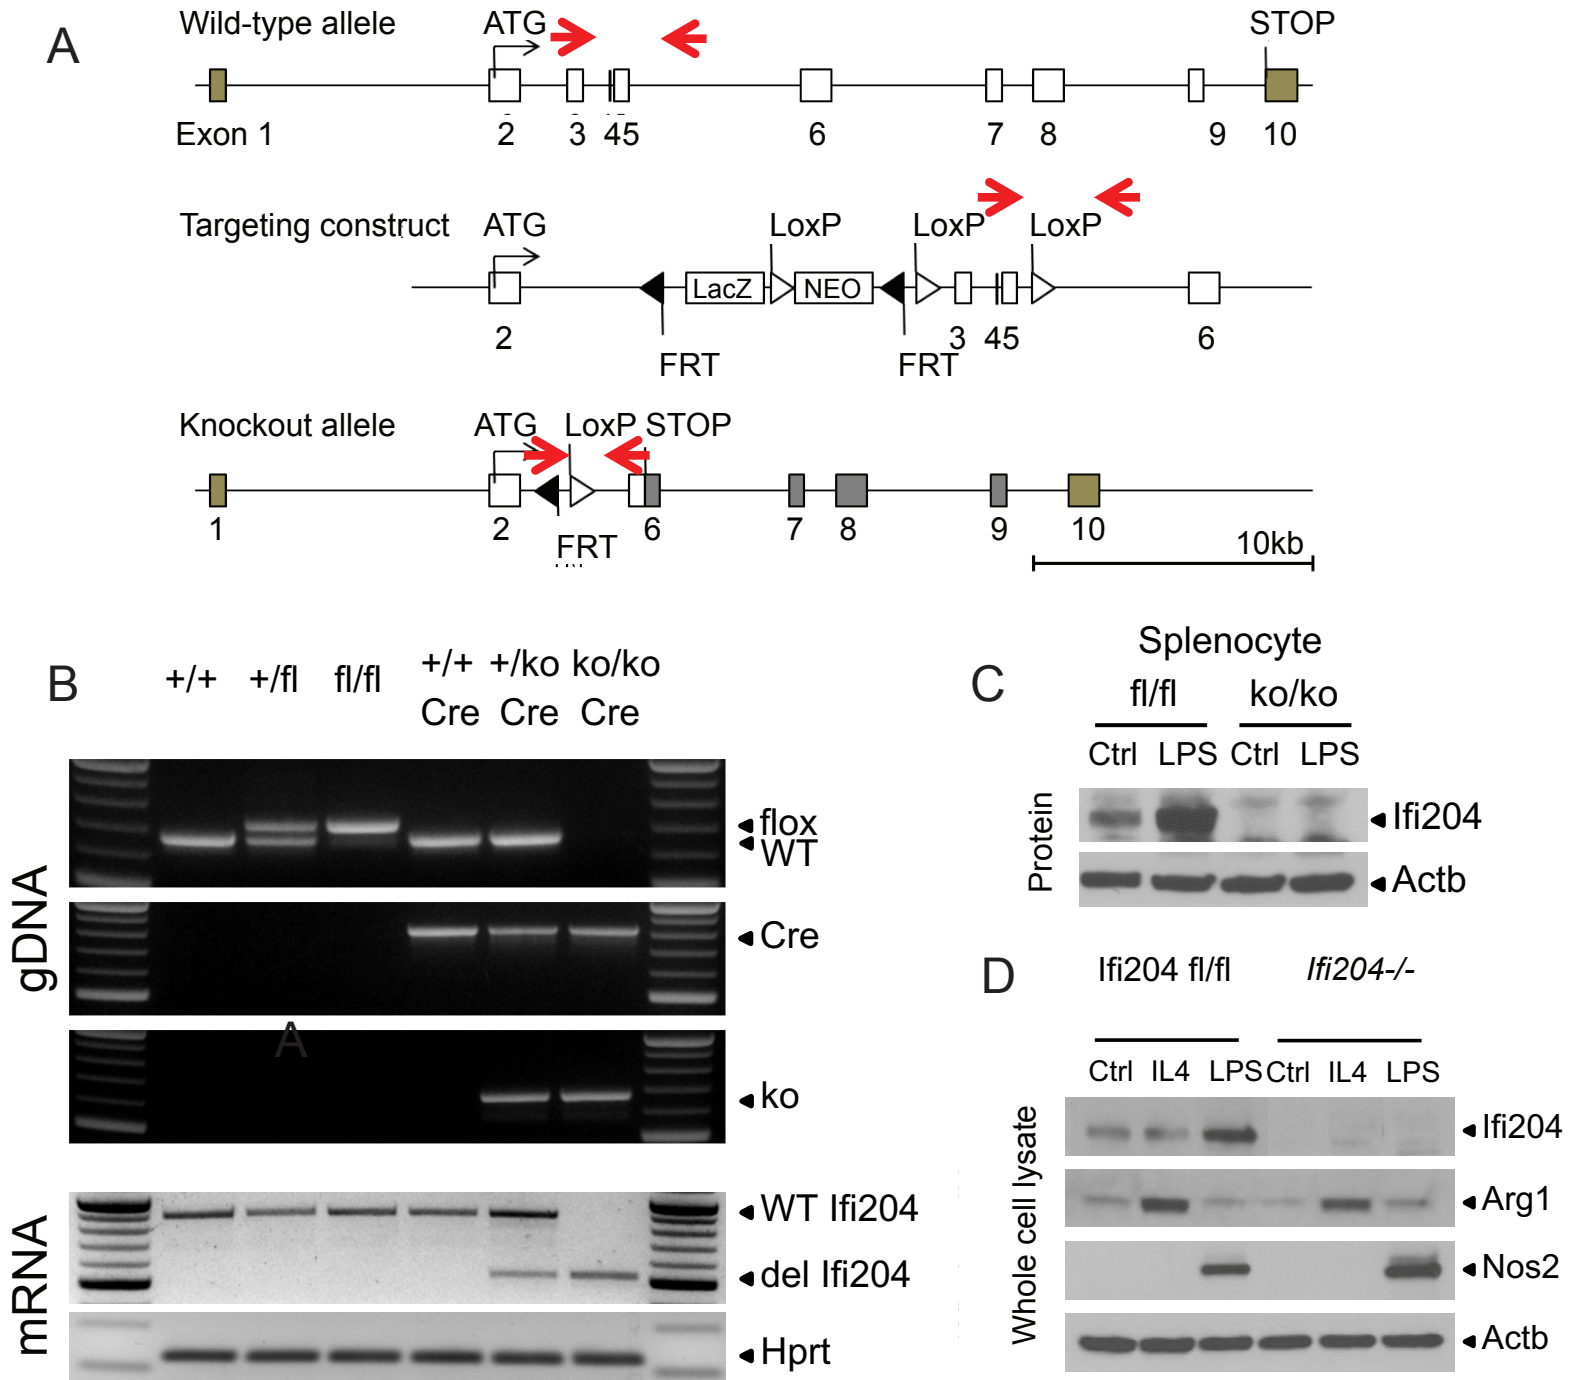

# Supplemental figure 2

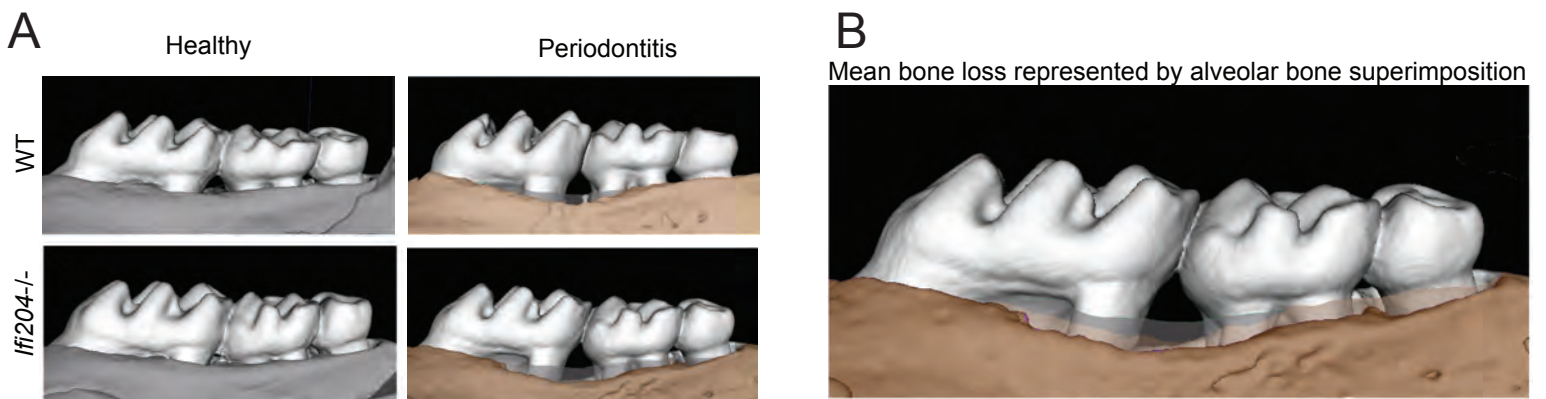

Supplement: NIHMS1797263-supplement-fS1-2.pdf [file NIHMS1797263-supplement-fS1-2.pdf]
